# Supplementary material
Source: publisher figshare collection journal article supplement (https://acs.figshare.com/ndownloader/files/5928228)
Supplement: Supplementary file 1 [file 5928228]

data_pm-3n-hf_a
_audit_creation_date              2016-06-20
_audit_creation_method
;
Olex2 1.2
(compiled 2016.02.19 svn.r3266 for OlexSys, GUI svn.r5155)
;
_shelxl_version_number            2013-4
_publ_contact_author_address      ?
_publ_contact_author_email        ?
_publ_contact_author_name         ''
_publ_contact_author_phone        ?
_publ_section_references
;
Dolomanov, O.V., Bourhis, L.J., Gildea, R.J, Howard, J.A.K. & Puschmann, H.
 (2009), J. Appl. Cryst. 42, 339-341.

Sheldrick, G.M. (2008). Acta Cryst. A64, 112-122.
;
_chemical_name_common             ?
_chemical_name_systematic
;
 ?
;
_chemical_formula_moiety          '0(C1272 Hf52 O264)'
_chemical_formula_sum             'C1.25 Hf0.05 O0.26'
_chemical_formula_weight          28.33
_chemical_melting_point           ?
loop_
  _atom_type_symbol
  _atom_type_description
  _atom_type_scat_dispersion_real
  _atom_type_scat_dispersion_imag
  _atom_type_scat_source
 'C' 'C' -0.0010 0.0050 'International Tables Vol C Tables 4.2.6.8 and 6.1.1.4'
 'Hf' 'Hf' -0.5170 2.4840
 'International Tables Vol C Tables 4.2.6.8 and 6.1.1.4'
 'O' 'O' 0.0020 0.0020 'International Tables Vol C Tables 4.2.6.8 and 6.1.1.4'

_shelx_space_group_comment
;
The symmetry employed for this shelxl refinement is uniquely defined
by the following loop, which should always be used as a source of
symmetry information in preference to the above space-group names.
They are only intended as comments.
;
_space_group_crystal_system       'cubic'
_space_group_IT_number            223
_space_group_name_H-M_alt         'P m -3 n'
_space_group_name_Hall            '-P 4n 2 3'
loop_
  _space_group_symop_operation_xyz
 'x, y, z'
 '-x, -y, z'
 '-x, y, -z'
 'x, -y, -z'
 'z, x, y'
 'z, -x, -y'
 '-z, -x, y'
 '-z, x, -y'
 'y, z, x'
 '-y, z, -x'
 'y, -z, -x'
 '-y, -z, x'
 'y+1/2, x+1/2, -z+1/2'
 '-y+1/2, -x+1/2, -z+1/2'
 'y+1/2, -x+1/2, z+1/2'
 '-y+1/2, x+1/2, z+1/2'
 'x+1/2, z+1/2, -y+1/2'
 '-x+1/2, z+1/2, y+1/2'
 '-x+1/2, -z+1/2, -y+1/2'
 'x+1/2, -z+1/2, y+1/2'
 'z+1/2, y+1/2, -x+1/2'
 'z+1/2, -y+1/2, x+1/2'
 '-z+1/2, y+1/2, x+1/2'
 '-z+1/2, -y+1/2, -x+1/2'
 '-x, -y, -z'
 'x, y, -z'
 'x, -y, z'
 '-x, y, z'
 '-z, -x, -y'
 '-z, x, y'
 'z, x, -y'
 'z, -x, y'
 '-y, -z, -x'
 'y, -z, x'
 '-y, z, x'
 'y, z, -x'
 '-y-1/2, -x-1/2, z-1/2'
 'y-1/2, x-1/2, z-1/2'
 '-y-1/2, x-1/2, -z-1/2'
 'y-1/2, -x-1/2, -z-1/2'
 '-x-1/2, -z-1/2, y-1/2'
 'x-1/2, -z-1/2, -y-1/2'
 'x-1/2, z-1/2, y-1/2'
 '-x-1/2, z-1/2, -y-1/2'
 '-z-1/2, -y-1/2, x-1/2'
 '-z-1/2, y-1/2, -x-1/2'
 'z-1/2, -y-1/2, -x-1/2'
 'z-1/2, y-1/2, x-1/2'

_cell_length_a                    41.516(2)
_cell_length_b                    41.516(2)
_cell_length_c                    41.516(2)
_cell_angle_alpha                 90
_cell_angle_beta                  90
_cell_angle_gamma                 90
_cell_volume                      71556(12)
_cell_formula_units_Z             1016
_cell_measurement_reflns_used     9848
_cell_measurement_temperature     100(2)
_cell_measurement_theta_max       11.2934
_cell_measurement_theta_min       2.1724
_shelx_estimated_absorpt_T_max    ?
_shelx_estimated_absorpt_T_min    ?
_exptl_absorpt_coefficient_mu     0.424
_exptl_absorpt_correction_T_max   ?
_exptl_absorpt_correction_T_min   ?
_exptl_absorpt_correction_type    ?
_exptl_absorpt_process_details    ?
_exptl_crystal_colour             colorless
_exptl_crystal_density_diffrn     0.668
_exptl_crystal_density_meas       ?
_exptl_crystal_density_method     ?
_exptl_crystal_description        cube
_exptl_crystal_F_000              13488
_exptl_crystal_size_max           ?
_exptl_crystal_size_mid           ?
_exptl_crystal_size_min           ?
_exptl_special_details
;
 ?
;
_exptl_transmission_factor_max    ?
_exptl_transmission_factor_min    ?
_diffrn_reflns_av_R_equivalents   0.1688
_diffrn_reflns_av_unetI/netI      0.0428
_diffrn_reflns_Laue_measured_fraction_full 0.150
_diffrn_reflns_Laue_measured_fraction_max 0.997
_diffrn_reflns_limit_h_max        46
_diffrn_reflns_limit_h_min        -43
_diffrn_reflns_limit_k_max        46
_diffrn_reflns_limit_k_min        -34
_diffrn_reflns_limit_l_max        45
_diffrn_reflns_limit_l_min        -46
_diffrn_reflns_number             640669
_diffrn_reflns_point_group_measured_fraction_full 0.150
_diffrn_reflns_point_group_measured_fraction_max 0.997
_diffrn_reflns_theta_full         26.000
_diffrn_reflns_theta_max          13.369
_diffrn_reflns_theta_min          0.638
_diffrn_ambient_temperature       99.95
_diffrn_detector_area_resol_mean  ?
_diffrn_measured_fraction_theta_full 0.150
_diffrn_measured_fraction_theta_max 0.997
_diffrn_measurement_device_type   'synchrotron, beamline 15-ID, APEX2 detector'
_diffrn_measurement_method        'phi scans'
_diffrn_radiation_type            'synchrotron radiation'
_diffrn_radiation_wavelength      0.41328
_diffrn_source                    'synchrotron radiation'
_reflns_Friedel_coverage          0.000
_reflns_Friedel_fraction_full     .
_reflns_Friedel_fraction_max      .
_reflns_number_gt                 7375
_reflns_number_total              9175
_reflns_special_details
;
 Reflections were merged by SHELXL according to the crystal
 class for the calculation of statistics and refinement.
 
 _reflns_Friedel_fraction is defined as the number of unique
 Friedel pairs measured divided by the number that would be
 possible theoretically, ignoring centric projections and
 systematic absences.
;
_reflns_threshold_expression      'I > 2\s(I)'
_computing_cell_refinement        ?
_computing_data_collection        ?
_computing_data_reduction         ?
_computing_molecular_graphics     'Olex2 (Dolomanov et al., 2009)'
_computing_publication_material   'Olex2 (Dolomanov et al., 2009)'
_computing_structure_refinement   'XL (Sheldrick, 2008)'
_computing_structure_solution     ?
_refine_diff_density_max          0.953
_refine_diff_density_min          -2.601
_refine_diff_density_rms          0.180
_refine_ls_extinction_coef        .
_refine_ls_extinction_method      none
_refine_ls_goodness_of_fit_ref    1.244
_refine_ls_hydrogen_treatment     undef
_refine_ls_matrix_type            full
_refine_ls_number_parameters      310
_refine_ls_number_reflns          9175
_refine_ls_number_restraints      623
_refine_ls_R_factor_all           0.1540
_refine_ls_R_factor_gt            0.1145
_refine_ls_restrained_S_all       1.253
_refine_ls_shift/su_max           0.000
_refine_ls_shift/su_mean          0.000
_refine_ls_structure_factor_coef  Fsqd
_refine_ls_weighting_details
'w=1/[\s^2^(Fo^2^)+(0.1367P)^2^+328.5184P] where P=(Fo^2^+2Fc^2^)/3'
_refine_ls_weighting_scheme       calc
_refine_ls_wR_factor_gt           0.2758
_refine_ls_wR_factor_ref          0.3046
_refine_special_details
;
 ?
;
_olex2_refinement_description
;
1. Restrained distances
 C1D-C8A
 1.468 with sigma of 0.02
 C8A-C58
 1.4 with sigma of 0.02
 C58-C12
 1.4 with sigma of 0.02
 C5A-C58
 2.425 with sigma of 0.02
 C12-C8A
 2.425 with sigma of 0.02
2. Restrained planarity
 C5B, C2B, C3B, C4B, C6B, C1B
 with sigma of 0.1
 C6B, C9B, C0, C5B
 with sigma of 0.1
 C1A, C3A, C5A, C4A, C2A, C0
 with sigma of 0.1
 C4A, C5A, C8A, C1D
 with sigma of 0.1
 C9B, C46, C19, C6B
 with sigma of 0.1
 C5A, C12, C58, C8A
 with sigma of 0.1
3. Rigid bond restraints
 All non-hydrogen atoms
 with sigma for 1-2 distances of 0.01 and sigma for 1-3 distances of 0.01
4. Uiso/Uaniso restraints and constraints
All non-hydrogen atoms have similar U: within 2A with sigma of 0.04 and sigma
for terminal atoms of 0.08
5. Rigid body (RIGU) restrains
 All non-hydrogen atoms
 with sigma for 1-2 distances of 0.004 and sigma for 1-3 distances of 0.004
6.a Fitted hexagon refined as free rotating group:
 C8(C9,C31,C2,C1AA,C0AA)
;
_atom_sites_solution_hydrogens    .
_atom_sites_solution_primary      ?
_atom_sites_solution_secondary    ?
loop_
  _atom_site_label
  _atom_site_type_symbol
  _atom_site_fract_x
  _atom_site_fract_y
  _atom_site_fract_z
  _atom_site_U_iso_or_equiv
  _atom_site_adp_type
  _atom_site_occupancy
  _atom_site_site_symmetry_order
  _atom_site_calc_flag
  _atom_site_refinement_flags_posn
  _atom_site_refinement_flags_adp
  _atom_site_refinement_flags_occupancy
  _atom_site_disorder_assembly
  _atom_site_disorder_group
 Hf1 Hf 0.95805(2) 0.54195(2) 0.7500 0.0579(3) Uani 1 2 d S TU P . .
 Hf2 Hf 1.0000 0.5000 0.69042(3) 0.0606(4) Uani 1 4 d S TU P . .
 O1 O 0.9401(2) 0.56119(19) 0.7042(2) 0.072(2) Uani 1 1 d . U . . .
 O3 O 0.9532(2) 0.5000 0.7172(3) 0.057(2) Uani 1 2 d S TU P . .
 O0AA O 1.0000 0.5354(3) 0.7238(3) 0.060(2) Uani 1 2 d S TU P . .
 O5 O 0.9726(2) 0.59318(19) 0.7478(2) 0.073(2) Uani 1 1 d . U . . .
 O4 O 1.0317(2) 0.4657(2) 0.6648(2) 0.079(3) Uani 1 1 d . U . . .
 C2AA C 0.9309(4) 0.5739(4) 0.6502(4) 0.093(4) Uani 1 1 d . U . . .
 C4 C 0.9190(6) 0.5845(5) 0.5948(4) 0.147(7) Uani 1 1 d . U . . .
 C3 C 0.9386(5) 0.5693(5) 0.6175(4) 0.133(6) Uani 1 1 d . U . . .
 C6 C 0.9060(5) 0.5970(5) 0.6603(4) 0.121(5) Uani 1 1 d . U . . .
 C7 C 0.8859(5) 0.6100(5) 0.6359(5) 0.131(6) Uani 1 1 d . U . . .
 C5 C 0.8934(5) 0.6057(5) 0.6030(5) 0.125(5) Uani 1 1 d . U . . .
 C1 C 0.9490(4) 0.5541(3) 0.6751(4) 0.075(3) Uani 1 1 d . U . . .
 C1B C 1.0000 0.6073(4) 0.7441(4) 0.069(4) Uani 1 2 d S TU P . .
 C5B C 1.0000 0.7062(5) 0.7166(4) 0.094(6) Uani 1 2 d S TU P . .
 C2B C 1.0000 0.6406(4) 0.7349(4) 0.075(4) Uani 1 2 d S TU P . .
 C6B C 1.0000 0.7393(5) 0.7074(5) 0.101(6) Uani 1 2 d S TU P . .
 C3B C 1.0296(3) 0.6572(3) 0.7298(4) 0.089(4) Uani 1 1 d . U . . .
 C8 C 0.8719(4) 0.6197(4) 0.5806(3) 0.139(5) Uani 1 1 d . U . . .
 C9 C 0.8403(4) 0.6090(4) 0.5772(4) 0.214(9) Uani 1 1 d G U . . .
 C31 C 0.8205(3) 0.6229(4) 0.5540(5) 0.229(10) Uani 1 1 d G U . . .
 C2 C 0.8322(4) 0.6473(4) 0.5343(4) 0.196(9) Uani 1 1 d G U . . .
 C1AA C 0.8638(4) 0.6579(4) 0.5378(4) 0.210(9) Uani 1 1 d G U . . .
 C0AA C 0.8836(3) 0.6441(4) 0.5609(4) 0.189(9) Uani 1 1 d G U . . .
 C4B C 1.0287(4) 0.6898(3) 0.7212(4) 0.100(5) Uani 1 1 d . U . . .
 Hf0A Hf 0.96708(7) 0.96708(7) 0.96708(7) 0.346(3) Uani 1 3 d S TU P . .
 O1AA O 1.0000 0.9503(3) 0.9682(5) 0.198(5) Uani 1 2 d S TU P . .
 O31 O 0.9757(8) 0.9408(9) 0.9220(7) 0.364(12) Uani 1 1 d . U . . .
 C9B C 1.0000 0.8065(5) 0.6908(6) 0.102(5) Uani 1 2 d S TU P . .
 C1A C 1.0000 0.8591(5) 0.7180(7) 0.125(6) Uani 1 2 d S TU P . .
 C0 C 1.0000 0.8430(5) 0.6865(6) 0.097(5) Uani 1 2 d S TU P . .
 C3A C 0.9772(7) 0.8699(8) 0.7718(7) 0.251(11) Uani 1 1 d . U . . .
 C5A C 1.0000 0.9064(12) 0.8110(9) 0.275(13) Uani 1 2 d DS TU P . .
 C4A C 1.0000 0.8905(10) 0.7802(12) 0.249(12) Uani 1 2 d S TU P . .
 C2A C 0.9750(6) 0.8518(8) 0.7397(7) 0.215(10) Uani 1 1 d . U . . .
 C8A C 1.0000 0.9274(17) 0.8764(12) 0.368(15) Uani 1 2 d DS TU P . .
 C1D C 1.0000 0.952(2) 0.902(2) 0.396(14) Uani 1 2 d DS TU P . .
 C12 C 0.9737(9) 0.9036(10) 0.8299(10) 0.325(13) Uani 1 1 d D U . . .
 C19 C 0.9752(4) 0.7567(4) 0.7052(6) 0.174(8) Uani 1 1 d . U . . .
 C46 C 0.9747(4) 0.7902(4) 0.6966(6) 0.170(8) Uani 1 1 d . U . . .
 C58 C 0.9730(7) 0.9135(9) 0.8622(8) 0.338(13) Uani 1 1 d D U . . .

loop_
  _atom_site_aniso_label
  _atom_site_aniso_U_11
  _atom_site_aniso_U_22
  _atom_site_aniso_U_33
  _atom_site_aniso_U_23
  _atom_site_aniso_U_13
  _atom_site_aniso_U_12
 Hf1 0.0519(3) 0.0519(3) 0.0700(5) 0.0030(3) 0.0030(3) 0.0004(3)
 Hf2 0.0481(6) 0.0669(7) 0.0667(7) 0.000 0.000 0.000
 O1 0.070(5) 0.061(4) 0.085(4) 0.012(4) -0.012(4) -0.002(3)
 O3 0.047(5) 0.056(4) 0.067(6) 0.000 -0.002(4) 0.000
 O0AA 0.049(5) 0.059(5) 0.074(6) 0.003(4) 0.000 0.000
 O5 0.068(4) 0.052(3) 0.100(6) -0.001(4) 0.003(4) -0.003(3)
 O4 0.047(5) 0.084(6) 0.106(7) -0.023(5) 0.001(4) 0.001(4)
 C2AA 0.094(8) 0.097(9) 0.087(5) 0.019(6) -0.006(5) 0.008(6)
 C4 0.177(12) 0.168(14) 0.095(7) 0.026(8) -0.013(7) 0.078(11)
 C3 0.163(12) 0.150(13) 0.087(6) 0.027(7) -0.003(6) 0.067(10)
 C6 0.124(10) 0.134(11) 0.105(7) 0.014(7) -0.010(7) 0.042(9)
 C7 0.139(11) 0.146(13) 0.110(7) 0.009(7) -0.022(7) 0.054(10)
 C5 0.147(9) 0.121(10) 0.107(7) 0.012(7) -0.022(7) 0.044(8)
 C1 0.075(7) 0.068(7) 0.083(5) 0.013(5) -0.009(5) -0.019(5)
 C1B 0.067(6) 0.052(5) 0.087(11) 0.009(6) 0.000 0.000
 C5B 0.078(8) 0.075(7) 0.128(15) 0.038(8) 0.000 0.000
 C2B 0.074(7) 0.056(6) 0.095(12) 0.013(6) 0.000 0.000
 C6B 0.068(8) 0.078(7) 0.157(17) 0.049(9) 0.000 0.000
 C3B 0.081(7) 0.065(5) 0.122(11) 0.031(6) -0.006(6) -0.007(4)
 C8 0.169(10) 0.113(11) 0.135(9) 0.019(8) -0.057(8) 0.027(8)
 C9 0.193(11) 0.191(16) 0.259(18) 0.115(14) -0.106(11) -0.010(10)
 C31 0.213(13) 0.184(17) 0.291(19) 0.129(15) -0.133(13) -0.027(11)
 C2 0.211(14) 0.135(15) 0.243(17) 0.085(13) -0.122(13) -0.014(11)
 C1AA 0.226(15) 0.173(16) 0.231(16) 0.093(13) -0.128(13) -0.037(12)
 C0AA 0.206(13) 0.173(14) 0.189(14) 0.074(12) -0.102(11) -0.021(11)
 C4B 0.078(7) 0.067(6) 0.154(13) 0.034(7) -0.004(7) -0.004(4)
 Hf0A 0.346(3) 0.346(3) 0.346(3) -0.070(2) -0.070(2) -0.070(2)
 O1AA 0.399(10) 0.019(7) 0.176(13) 0.023(8) 0.000 0.000
 O31 0.43(2) 0.38(3) 0.276(12) -0.054(15) -0.065(9) -0.025(16)
 C9B 0.067(9) 0.085(8) 0.156(15) 0.031(8) 0.000 0.000
 C1A 0.099(13) 0.134(12) 0.142(12) -0.002(10) 0.000 0.000
 C0 0.078(11) 0.082(8) 0.130(12) 0.027(8) 0.000 0.000
 C3A 0.187(19) 0.38(3) 0.182(14) -0.077(14) 0.039(11) -0.033(14)
 C5A 0.22(2) 0.38(3) 0.22(2) -0.090(19) 0.000 0.000
 C4A 0.17(2) 0.35(3) 0.227(19) -0.079(18) 0.000 0.000
 C2A 0.160(15) 0.32(2) 0.168(13) -0.037(13) 0.047(9) -0.059(14)
 C8A 0.44(3) 0.34(3) 0.325(16) -0.028(19) 0.000 0.000
 C1D 0.47(3) 0.35(3) 0.359(14) -0.051(19) 0.000 0.000
 C12 0.29(2) 0.40(3) 0.286(17) -0.077(18) 0.078(10) 0.014(15)
 C19 0.074(8) 0.096(7) 0.35(2) 0.083(10) 0.003(9) 0.006(5)
 C46 0.071(8) 0.093(7) 0.34(2) 0.079(10) 0.008(9) 0.004(5)
 C58 0.38(3) 0.36(3) 0.275(17) -0.065(17) 0.077(11) 0.018(15)

_geom_special_details
;
 All esds (except the esd in the dihedral angle between two l.s. planes)
 are estimated using the full covariance matrix.  The cell esds are taken
 into account individually in the estimation of esds in distances, angles
 and torsion angles; correlations between esds in cell parameters are only
 used when they are defined by crystal symmetry.  An approximate (isotropic)
 treatment of cell esds is used for estimating esds involving l.s. planes.
;
loop_
  _geom_bond_atom_site_label_1
  _geom_bond_atom_site_label_2
  _geom_bond_distance
  _geom_bond_site_symmetry_2
  _geom_bond_publ_flag
 Hf1 Hf1 3.4833(10) 27_565 ?
 Hf1 Hf1 3.4833(10) 28_755 ?
 Hf1 Hf2 3.4908(9) . ?
 Hf1 Hf2 3.4908(9) 13_546 ?
 Hf1 O1 2.195(8) . ?
 Hf1 O1 2.195(8) 14_666 ?
 Hf1 O3 2.221(7) 14_666 ?
 Hf1 O3 2.221(7) . ?
 Hf1 O0AA 2.071(6) . ?
 Hf1 O0AA 2.071(6) 14_666 ?
 Hf1 O5 2.212(8) . ?
 Hf1 O5 2.212(8) 14_666 ?
 Hf2 Hf1 3.4907(9) 28_755 ?
 Hf2 Hf1 3.4907(9) 27_565 ?
 Hf2 Hf1 3.4907(9) 2_765 ?
 Hf2 O3 2.236(10) 2_765 ?
 Hf2 O3 2.236(10) . ?
 Hf2 O0AA 2.019(11) . ?
 Hf2 O0AA 2.019(11) 2_765 ?
 Hf2 O4 2.213(9) 27_565 ?
 Hf2 O4 2.213(9) 28_755 ?
 Hf2 O4 2.213(9) 2_765 ?
 Hf2 O4 2.213(9) . ?
 O1 C1 1.297(17) . ?
 O3 Hf1 2.221(7) 27_565 ?
 O0AA Hf1 2.071(6) 28_755 ?
 O5 C1B 1.290(11) . ?
 O4 C1 1.224(17) 2_765 ?
 C2AA C3 1.41(2) . ?
 C2AA C6 1.47(2) . ?
 C2AA C1 1.517(19) . ?
 C4 C3 1.40(2) . ?
 C4 C5 1.42(3) . ?
 C6 C7 1.42(2) . ?
 C7 C5 1.41(3) . ?
 C5 C8 1.414(19) . ?
 C1 O4 1.224(17) 2_765 ?
 C1B O5 1.290(11) 28_755 ?
 C1B C2B 1.44(2) . ?
 C5B C6B 1.43(3) . ?
 C5B C4B 1.386(18) . ?
 C5B C4B 1.386(18) 28_755 ?
 C2B C3B 1.425(16) . ?
 C2B C3B 1.425(16) 28_755 ?
 C6B C19 1.26(2) . ?
 C6B C19 1.26(2) 28_755 ?
 C3B C4B 1.401(19) . ?
 C8 C9 1.3900 . ?
 C8 C0AA 1.3900 . ?
 C9 C31 1.3900 . ?
 C31 C2 1.3900 . ?
 C2 C1AA 1.3900 . ?
 C2 C0 1.673(15) 45_775 ?
 C1AA C0AA 1.3900 . ?
 Hf0A Hf0A 2.733(6) 26_557 ?
 Hf0A Hf0A 2.733(6) 27_575 ?
 Hf0A Hf0A 2.733(6) 28_755 ?
 Hf0A O1AA 1.534(6) 5 ?
 Hf0A O1AA 1.534(6) 9 ?
 Hf0A O1AA 1.534(6) . ?
 Hf0A O31 2.20(3) 5 ?
 Hf0A O31 2.20(3) . ?
 Hf0A O31 2.20(3) 9 ?
 O1AA Hf0A 1.534(6) 28_755 ?
 O31 C1D 1.37(7) . ?
 C9B C0 1.52(3) . ?
 C9B C46 1.27(2) 28_755 ?
 C9B C46 1.27(2) . ?
 C1A C0 1.47(4) . ?
 C1A C2A 1.41(3) . ?
 C1A C2A 1.41(3) 28_755 ?
 C0 C2 1.67(10) 24_666 ?
 C0 C2 1.67(11) 47_677 ?
 C3A C3A 1.89(6) 28_755 ?
 C3A C4A 1.32(4) . ?
 C3A C2A 1.54(4) . ?
 C5A C4A 1.44(6) . ?
 C5A C12 1.35(4) 28_755 ?
 C5A C12 1.35(4) . ?
 C4A C3A 1.32(4) 28_755 ?
 C8A C1D 1.48(2) . ?
 C8A C58 1.389(19) . ?
 C8A C58 1.389(19) 28_755 ?
 C1D O31 1.37(7) 28_755 ?
 C12 C58 1.405(18) . ?
 C19 C46 1.44(2) . ?

loop_
  _geom_angle_atom_site_label_1
  _geom_angle_atom_site_label_2
  _geom_angle_atom_site_label_3
  _geom_angle
  _geom_angle_site_symmetry_1
  _geom_angle_site_symmetry_3
  _geom_angle_publ_flag
 Hf1 Hf1 Hf1 89.995(1) 28_755 27_565 ?
 Hf1 Hf1 Hf2 60.068(9) 27_565 13_546 ?
 Hf1 Hf1 Hf2 60.068(9) 28_755 . ?
 Hf1 Hf1 Hf2 60.069(9) 27_565 . ?
 Hf1 Hf1 Hf2 60.068(9) 28_755 13_546 ?
 Hf2 Hf1 Hf2 90.24(3) 13_546 . ?
 O1 Hf1 Hf1 111.3(2) 14_666 28_755 ?
 O1 Hf1 Hf1 111.3(2) . 27_565 ?
 O1 Hf1 Hf1 109.9(2) . 28_755 ?
 O1 Hf1 Hf1 109.9(2) 14_666 27_565 ?
 O1 Hf1 Hf2 74.7(2) 14_666 13_546 ?
 O1 Hf1 Hf2 164.9(2) 14_666 . ?
 O1 Hf1 Hf2 164.9(2) . 13_546 ?
 O1 Hf1 Hf2 74.7(2) . . ?
 O1 Hf1 O1 120.3(5) 14_666 . ?
 O1 Hf1 O3 73.9(3) 14_666 14_666 ?
 O1 Hf1 O3 140.0(3) 14_666 . ?
 O1 Hf1 O3 73.9(3) . . ?
 O1 Hf1 O3 140.0(3) . 14_666 ?
 O1 Hf1 O5 78.9(3) . 14_666 ?
 O1 Hf1 O5 79.0(3) 14_666 . ?
 O1 Hf1 O5 73.0(3) 14_666 14_666 ?
 O1 Hf1 O5 73.0(3) . . ?
 O3 Hf1 Hf1 95.1(3) . 28_755 ?
 O3 Hf1 Hf1 95.1(3) 14_666 27_565 ?
 O3 Hf1 Hf1 38.4(2) 14_666 28_755 ?
 O3 Hf1 Hf1 38.4(2) . 27_565 ?
 O3 Hf1 Hf2 38.6(3) 14_666 13_546 ?
 O3 Hf1 Hf2 95.1(2) 14_666 . ?
 O3 Hf1 Hf2 38.6(3) . . ?
 O3 Hf1 Hf2 95.1(2) . 13_546 ?
 O3 Hf1 O3 121.2(5) . 14_666 ?
 O0AA Hf1 Hf1 82.4(3) . 27_565 ?
 O0AA Hf1 Hf1 82.4(3) 14_666 28_755 ?
 O0AA Hf1 Hf1 32.8(3) . 28_755 ?
 O0AA Hf1 Hf1 32.8(3) 14_666 27_565 ?
 O0AA Hf1 Hf2 83.5(3) 14_666 . ?
 O0AA Hf1 Hf2 83.5(3) . 13_546 ?
 O0AA Hf1 Hf2 31.0(3) . . ?
 O0AA Hf1 Hf2 31.0(3) 14_666 13_546 ?
 O0AA Hf1 O1 83.0(4) 14_666 14_666 ?
 O0AA Hf1 O1 83.0(4) . . ?
 O0AA Hf1 O1 143.7(4) . 14_666 ?
 O0AA Hf1 O1 143.7(3) 14_666 . ?
 O0AA Hf1 O3 69.5(4) 14_666 14_666 ?
 O0AA Hf1 O3 69.5(4) . . ?
 O0AA Hf1 O3 71.0(4) . 14_666 ?
 O0AA Hf1 O3 71.0(3) 14_666 . ?
 O0AA Hf1 O0AA 93.1(6) 14_666 . ?
 O0AA Hf1 O5 82.9(4) . . ?
 O0AA Hf1 O5 142.6(4) 14_666 . ?
 O0AA Hf1 O5 82.9(4) 14_666 14_666 ?
 O0AA Hf1 O5 142.6(4) . 14_666 ?
 O5 Hf1 Hf1 164.0(2) 14_666 28_755 ?
 O5 Hf1 Hf1 74.2(2) 14_666 27_565 ?
 O5 Hf1 Hf1 164.0(2) . 27_565 ?
 O5 Hf1 Hf1 74.2(2) . 28_755 ?
 O5 Hf1 Hf2 111.9(2) . 13_546 ?
 O5 Hf1 Hf2 108.3(2) . . ?
 O5 Hf1 Hf2 111.9(2) 14_666 . ?
 O5 Hf1 Hf2 108.3(2) 14_666 13_546 ?
 O5 Hf1 O3 138.9(3) 14_666 14_666 ?
 O5 Hf1 O3 74.1(3) 14_666 . ?
 O5 Hf1 O3 74.1(3) . 14_666 ?
 O5 Hf1 O3 138.9(3) . . ?
 O5 Hf1 O5 121.7(4) . 14_666 ?
 Hf1 Hf2 Hf1 59.858(18) 2_765 27_565 ?
 Hf1 Hf2 Hf1 59.859(18) 27_565 . ?
 Hf1 Hf2 Hf1 89.75(3) 28_755 27_565 ?
 Hf1 Hf2 Hf1 59.859(18) 28_755 . ?
 Hf1 Hf2 Hf1 89.76(3) 2_765 . ?
 Hf1 Hf2 Hf1 59.857(18) 28_755 2_765 ?
 O3 Hf2 Hf1 38.29(16) . . ?
 O3 Hf2 Hf1 94.7(2) 2_765 . ?
 O3 Hf2 Hf1 38.29(16) . 27_565 ?
 O3 Hf2 Hf1 38.29(16) 2_765 2_765 ?
 O3 Hf2 Hf1 94.7(2) 2_765 27_565 ?
 O3 Hf2 Hf1 94.7(2) . 28_755 ?
 O3 Hf2 Hf1 94.7(2) . 2_765 ?
 O3 Hf2 Hf1 38.29(16) 2_765 28_755 ?
 O3 Hf2 O3 120.5(5) 2_765 . ?
 O0AA Hf2 Hf1 31.87(11) . . ?
 O0AA Hf2 Hf1 82.9(3) . 27_565 ?
 O0AA Hf2 Hf1 31.87(10) . 28_755 ?
 O0AA Hf2 Hf1 82.9(3) 2_765 . ?
 O0AA Hf2 Hf1 82.9(3) 2_765 28_755 ?
 O0AA Hf2 Hf1 31.87(10) 2_765 2_765 ?
 O0AA Hf2 Hf1 82.9(3) . 2_765 ?
 O0AA Hf2 Hf1 31.87(10) 2_765 27_565 ?
 O0AA Hf2 O3 70.1(2) . 2_765 ?
 O0AA Hf2 O3 70.1(2) . . ?
 O0AA Hf2 O3 70.1(2) 2_765 2_765 ?
 O0AA Hf2 O3 70.1(2) 2_765 . ?
 O0AA Hf2 O0AA 93.3(6) . 2_765 ?
 O0AA Hf2 O4 82.1(4) . 2_765 ?
 O0AA Hf2 O4 143.0(2) . 28_755 ?
 O0AA Hf2 O4 143.0(2) . . ?
 O0AA Hf2 O4 82.1(4) 2_765 . ?
 O0AA Hf2 O4 82.1(4) 2_765 28_755 ?
 O0AA Hf2 O4 143.0(2) 2_765 2_765 ?
 O0AA Hf2 O4 82.1(4) . 27_565 ?
 O0AA Hf2 O4 143.0(2) 2_765 27_565 ?
 O4 Hf2 Hf1 111.4(2) 2_765 27_565 ?
 O4 Hf2 Hf1 108.4(3) 27_565 . ?
 O4 Hf2 Hf1 108.4(3) 2_765 28_755 ?
 O4 Hf2 Hf1 108.5(3) 28_755 2_765 ?
 O4 Hf2 Hf1 73.9(3) 28_755 27_565 ?
 O4 Hf2 Hf1 111.4(2) 27_565 2_765 ?
 O4 Hf2 Hf1 111.4(2) 28_755 . ?
 O4 Hf2 Hf1 111.4(2) . 28_755 ?
 O4 Hf2 Hf1 73.9(3) 2_765 . ?
 O4 Hf2 Hf1 163.5(3) 28_755 28_755 ?
 O4 Hf2 Hf1 163.5(3) 2_765 2_765 ?
 O4 Hf2 Hf1 108.5(3) . 27_565 ?
 O4 Hf2 Hf1 163.5(3) 27_565 27_565 ?
 O4 Hf2 Hf1 73.9(3) 27_565 28_755 ?
 O4 Hf2 Hf1 73.9(3) . 2_765 ?
 O4 Hf2 Hf1 163.5(3) . . ?
 O4 Hf2 O3 73.9(3) 28_755 . ?
 O4 Hf2 O3 139.0(2) 28_755 2_765 ?
 O4 Hf2 O3 139.0(2) . . ?
 O4 Hf2 O3 139.0(2) 27_565 . ?
 O4 Hf2 O3 73.9(3) 27_565 2_765 ?
 O4 Hf2 O3 73.9(3) 2_765 . ?
 O4 Hf2 O3 73.9(3) . 2_765 ?
 O4 Hf2 O3 139.0(2) 2_765 2_765 ?
 O4 Hf2 O4 73.0(4) 27_565 2_765 ?
 O4 Hf2 O4 122.5(5) . 2_765 ?
 O4 Hf2 O4 80.2(5) 28_755 2_765 ?
 O4 Hf2 O4 122.5(5) 28_755 27_565 ?
 O4 Hf2 O4 73.0(4) . 28_755 ?
 O4 Hf2 O4 80.2(5) . 27_565 ?
 C1 O1 Hf1 128.9(8) . . ?
 Hf1 O3 Hf1 103.3(4) 27_565 . ?
 Hf1 O3 Hf2 103.1(3) . . ?
 Hf1 O3 Hf2 103.1(3) 27_565 . ?
 Hf1 O0AA Hf1 114.5(5) 28_755 . ?
 Hf2 O0AA Hf1 117.1(3) . 28_755 ?
 Hf2 O0AA Hf1 117.2(3) . . ?
 C1B O5 Hf1 132.9(9) . . ?
 C1 O4 Hf2 130.8(10) 2_765 . ?
 C3 C2AA C6 121.4(15) . . ?
 C3 C2AA C1 118.0(15) . . ?
 C6 C2AA C1 120.6(15) . . ?
 C3 C4 C5 123.4(18) . . ?
 C4 C3 C2AA 117.3(17) . . ?
 C7 C6 C2AA 117.4(17) . . ?
 C5 C7 C6 120.7(17) . . ?
 C7 C5 C4 118.5(17) . . ?
 C7 C5 C8 116.4(17) . . ?
 C8 C5 C4 124.5(18) . . ?
 O1 C1 C2AA 111.6(13) . . ?
 O4 C1 O1 131.6(13) 2_765 . ?
 O4 C1 C2AA 116.8(14) 2_765 . ?
 O5 C1B O5 124.1(15) 28_755 . ?
 O5 C1B C2B 117.9(8) 28_755 . ?
 O5 C1B C2B 117.9(8) . . ?
 C4B C5B C6B 120.7(9) . . ?
 C4B C5B C6B 120.7(9) 28_755 . ?
 C4B C5B C4B 118.6(19) 28_755 . ?
 C3B C2B C1B 120.4(8) 28_755 . ?
 C3B C2B C1B 120.4(8) . . ?
 C3B C2B C3B 119.1(17) 28_755 . ?
 C19 C6B C5B 124.8(12) . . ?
 C19 C6B C5B 124.8(12) 28_755 . ?
 C19 C6B C19 110(2) . 28_755 ?
 C4B C3B C2B 118.9(14) . . ?
 C9 C8 C5 122.2(15) . . ?
 C9 C8 C0AA 120.0 . . ?
 C0AA C8 C5 117.7(15) . . ?
 C31 C9 C8 120.0 . . ?
 C9 C31 C2 120.0 . . ?
 C31 C2 C1AA 120.0 . . ?
 C31 C2 C0 121.0(14) . 45_775 ?
 C1AA C2 C0 116.7(14) . 45_775 ?
 C2 C1AA C0AA 120.0 . . ?
 C1AA C0AA C8 120.0 . . ?
 C5B C4B C3B 122.3(15) . . ?
 Hf0A Hf0A Hf0A 89.998(3) 28_755 26_557 ?
 Hf0A Hf0A Hf0A 89.998(4) 28_755 27_575 ?
 Hf0A Hf0A Hf0A 89.998(3) 26_557 27_575 ?
 O1AA Hf0A Hf0A 116.9(5) 9 28_755 ?
 O1AA Hf0A Hf0A 88.3(9) . 26_557 ?
 O1AA Hf0A Hf0A 27.0(5) 5 27_575 ?
 O1AA Hf0A Hf0A 27.0(5) . 28_755 ?
 O1AA Hf0A Hf0A 88.3(9) 9 27_575 ?
 O1AA Hf0A Hf0A 27.0(5) 9 26_557 ?
 O1AA Hf0A Hf0A 116.9(5) . 27_575 ?
 O1AA Hf0A Hf0A 116.9(5) 5 26_557 ?
 O1AA Hf0A Hf0A 88.3(9) 5 28_755 ?
 O1AA Hf0A O1AA 113.0(7) 9 5 ?
 O1AA Hf0A O1AA 113.0(7) 5 . ?
 O1AA Hf0A O1AA 113.0(7) 9 . ?
 O1AA Hf0A O31 148.0(13) 5 9 ?
 O1AA Hf0A O31 69.9(12) 5 5 ?
 O1AA Hf0A O31 69.9(12) . . ?
 O1AA Hf0A O31 92.9(11) . 9 ?
 O1AA Hf0A O31 148.0(13) . 5 ?
 O1AA Hf0A O31 148.0(13) 9 . ?
 O1AA Hf0A O31 69.9(12) 9 9 ?
 O1AA Hf0A O31 92.9(11) 9 5 ?
 O1AA Hf0A O31 92.9(11) 5 . ?
 O31 Hf0A Hf0A 148.5(10) . 26_557 ?
 O31 Hf0A Hf0A 148.5(10) 5 28_755 ?
 O31 Hf0A Hf0A 148.5(10) 9 27_575 ?
 O31 Hf0A Hf0A 80.7(9) 9 26_557 ?
 O31 Hf0A Hf0A 119.8(9) . 27_575 ?
 O31 Hf0A Hf0A 119.8(9) 5 26_557 ?
 O31 Hf0A Hf0A 80.7(9) 5 27_575 ?
 O31 Hf0A Hf0A 80.7(9) . 28_755 ?
 O31 Hf0A Hf0A 119.8(10) 9 28_755 ?
 O31 Hf0A O31 78.2(13) . 9 ?
 O31 Hf0A O31 78.2(13) . 5 ?
 O31 Hf0A O31 78.2(13) 9 5 ?
 Hf0A O1AA Hf0A 126.0(10) 28_755 . ?
 C1D O31 Hf0A 117(3) . . ?
 C46 C9B C0 123.4(12) . . ?
 C46 C9B C0 123.4(12) 28_755 . ?
 C46 C9B C46 111(2) . 28_755 ?
 C2A C1A C0 118.2(19) . . ?
 C2A C1A C0 118.2(19) 28_755 . ?
 C2A C1A C2A 95(3) 28_755 . ?
 C2 C0 C2 117(10) 24_666 47_677 ?
 C9B C0 C2 107(3) . 47_677 ?
 C9B C0 C2 107(2) . 24_666 ?
 C1A C0 C2 108(4) . 47_677 ?
 C1A C0 C2 108(4) . 24_666 ?
 C1A C0 C9B 110.3(17) . . ?
 C4A C3A C3A 44(2) . 28_755 ?
 C4A C3A C2A 126(4) . . ?
 C2A C3A C3A 93.4(14) . 28_755 ?
 C12 C5A C4A 119(2) 28_755 . ?
 C12 C5A C4A 119(2) . . ?
 C12 C5A C12 108(4) 28_755 . ?
 C3A C4A C3A 91(4) . 28_755 ?
 C3A C4A C5A 122(3) . . ?
 C3A C4A C5A 122(3) 28_755 . ?
 C1A C2A C3A 114(3) . . ?
 C58 C8A C1D 126.3(17) . . ?
 C58 C8A C1D 126.3(17) 28_755 . ?
 C58 C8A C58 107(4) 28_755 . ?
 O31 C1D O31 95(8) . 28_755 ?
 O31 C1D C8A 102(5) 28_755 . ?
 O31 C1D C8A 102(5) . . ?
 C5A C12 C58 123(3) . . ?
 C6B C19 C46 125.7(18) . . ?
 C9B C46 C19 123.3(18) . . ?
 C8A C58 C12 121(2) . . ?

loop_
  _geom_torsion_atom_site_label_1
  _geom_torsion_atom_site_label_2
  _geom_torsion_atom_site_label_3
  _geom_torsion_atom_site_label_4
  _geom_torsion
  _geom_torsion_site_symmetry_1
  _geom_torsion_site_symmetry_2
  _geom_torsion_site_symmetry_3
  _geom_torsion_site_symmetry_4
  _geom_torsion_publ_flag
 Hf1 O1 C1 O4 4(2) . . . 2_765 ?
 Hf1 O1 C1 C2AA -178.4(8) . . . . ?
 Hf1 O5 C1B O5 -16(3) . . . 28_755 ?
 Hf1 O5 C1B C2B 163.0(9) . . . . ?
 O5 C1B C2B C3B 178.6(16) 28_755 . . 28_755 ?
 O5 C1B C2B C3B 1(2) 28_755 . . . ?
 O5 C1B C2B C3B -1(2) . . . 28_755 ?
 O5 C1B C2B C3B -178.6(16) . . . . ?
 C2AA C6 C7 C5 -12(3) . . . . ?
 C4 C5 C8 C9 105(2) . . . . ?
 C4 C5 C8 C0AA -73(3) . . . . ?
 C3 C2AA C6 C7 12(3) . . . . ?
 C3 C2AA C1 O1 178.7(16) . . . . ?
 C3 C2AA C1 O4 -3(2) . . . 2_765 ?
 C3 C4 C5 C7 -4(4) . . . . ?
 C3 C4 C5 C8 -176(2) . . . . ?
 C6 C2AA C3 C4 -8(3) . . . . ?
 C6 C2AA C1 O1 -1(2) . . . . ?
 C6 C2AA C1 O4 176.6(15) . . . 2_765 ?
 C6 C7 C5 C4 8(4) . . . . ?
 C6 C7 C5 C8 -180(2) . . . . ?
 C7 C5 C8 C9 -66(2) . . . . ?
 C7 C5 C8 C0AA 116(2) . . . . ?
 C5 C4 C3 C2AA 4(4) . . . . ?
 C5 C8 C9 C31 -177.8(18) . . . . ?
 C5 C8 C0AA C1AA 177.9(17) . . . . ?
 C1 C2AA C3 C4 172.1(18) . . . . ?
 C1 C2AA C6 C7 -168.3(18) . . . . ?
 C1B C2B C3B C4B -179.3(13) . . . . ?
 C5B C6B C19 C46 178.9(19) . . . . ?
 C2B C3B C4B C5B -2(2) . . . . ?
 C6B C5B C4B C3B -179.2(14) . . . . ?
 C6B C19 C46 C9B -2(3) . . . . ?
 C3B C2B C3B C4B 3(2) 28_755 . . . ?
 C8 C9 C31 C2 0.0 . . . . ?
 C9 C8 C0AA C1AA 0.0 . . . . ?
 C9 C31 C2 C1AA 0.0 . . . . ?
 C9 C31 C2 C0 162.1(17) . . . 45_775 ?
 C31 C2 C1AA C0AA 0.0 . . . . ?
 C2 C1AA C0AA C8 0.0 . . . . ?
 C0AA C8 C9 C31 0.0 . . . . ?
 C4B C5B C6B C19 6(3) 28_755 . . . ?
 C4B C5B C6B C19 174(2) 28_755 . . 28_755 ?
 C4B C5B C6B C19 -174(2) . . . . ?
 C4B C5B C6B C19 -6(3) . . . 28_755 ?
 C4B C5B C4B C3B 1(3) 28_755 . . . ?
 Hf0A Hf0A O1AA Hf0A -93.3(18) 26_557 . . 28_755 ?
 Hf0A Hf0A O1AA Hf0A -4(2) 27_575 . . 28_755 ?
 Hf0A O31 C1D O31 73(6) . . . 28_755 ?
 Hf0A O31 C1D C8A 176(3) . . . . ?
 O1AA Hf0A O1AA Hf0A 25(3) 5 . . 28_755 ?
 O1AA Hf0A O1AA Hf0A -104.5(8) 9 . . 28_755 ?
 O31 Hf0A O1AA Hf0A 110(2) . . . 28_755 ?
 O31 Hf0A O1AA Hf0A 114(2) 5 . . 28_755 ?
 O31 Hf0A O1AA Hf0A -173.9(18) 9 . . 28_755 ?
 C0 C2 C1AA C0AA -162.8(16) 45_775 . . . ?
 C0 C9B C46 C19 -171(2) . . . . ?
 C0 C1A C2A C3A -179.9(11) . . . . ?
 C3A C3A C4A C5A -130(4) 28_755 . . . ?
 C3A C3A C2A C1A -33.3(18) 28_755 . . . ?
 C5A C12 C58 C8A 1(3) . . . . ?
 C4A C3A C2A C1A -1(2) . . . . ?
 C4A C5A C12 C58 169(3) . . . . ?
 C2A C1A C0 C2 -60(6) 28_755 . . 47_677 ?
 C2A C1A C0 C2 60(4) . . . 24_666 ?
 C2A C1A C0 C2 -173(5) . . . 47_677 ?
 C2A C1A C0 C2 173(4) 28_755 . . 24_666 ?
 C2A C1A C0 C9B 56.9(18) 28_755 . . . ?
 C2A C1A C0 C9B -56.9(18) . . . . ?
 C2A C1A C2A C3A 54(3) 28_755 . . . ?
 C2A C3A C4A C3A -50(4) . . . 28_755 ?
 C2A C3A C4A C5A 179.9(13) . . . . ?
 C1D C8A C58 C12 150(8) . . . . ?
 C12 C5A C4A C3A -125(4) . . . 28_755 ?
 C12 C5A C4A C3A 125(4) 28_755 . . . ?
 C12 C5A C4A C3A 9(4) 28_755 . . 28_755 ?
 C12 C5A C4A C3A -9(4) . . . . ?
 C12 C5A C12 C58 31(6) 28_755 . . . ?
 C19 C6B C19 C46 9(4) 28_755 . . . ?
 C46 C9B C0 C2 -35(6) . . . 24_666 ?
 C46 C9B C0 C2 -162(6) . . . 47_677 ?
 C46 C9B C0 C2 162(6) 28_755 . . 24_666 ?
 C46 C9B C0 C2 35(6) 28_755 . . 47_677 ?
 C46 C9B C0 C1A -82(3) 28_755 . . . ?
 C46 C9B C0 C1A 82(3) . . . . ?
 C46 C9B C46 C19 -6(4) 28_755 . . . ?
 C58 C8A C1D O31 40(11) . . . . ?
 C58 C8A C1D O31 -138(6) 28_755 . . . ?
 C58 C8A C1D O31 -40(11) 28_755 . . 28_755 ?
 C58 C8A C1D O31 138(6) . . . 28_755 ?
 C58 C8A C58 C12 -32(6) 28_755 . . . ?

_olex2_submission_special_instructions 'No special instructions were received'
